# Supplementary material for: Rapid Antibody Selection Using Surface Plasmon Resonance for High-Speed and Sensitive Hazelnut Lateral Flow Prototypes
Source: Biosensors (Basel). 2018 Dec 14;8(4):130. doi: 10.3390/bios8040130 (PMC6316566; doi:10.3390/bios8040130)
Supplement: Supplementary file 1 [file biosensors-08-00130-s001.zip]

Archive with 13 entries (12 files):
- S3.tif
- S5.tiff
- __MACOSX/
- __MACOSX/._S5.tiff
- Supplementary material 4 Table S1.tiff
- __MACOSX/._Supplementary material 4 Table S1.tiff
- S1.tif
- S2.tif
- S6B 50-6B12 v 50-5H9 LFIA.mp4
- S6A.tiff
- __MACOSX/._S6A.tiff
- FINAL REVISED BIOSENSORS SI.pdf
- __MACOSX/._FINAL REVISED BIOSENSORS SI.pdf
